# Supplementary material for: Superior antibody and membrane protein-specific T-cell responses to CoronaVac by intradermal versus intramuscular routes in adolescents
Source: PubMed Central journal article supplement (PMC11052846; doi:10.1007/s12519-023-00764-0), 2023-12-12
Supplement: 12519_2023_764_MOESM4_ESM.pdf [file 12519_2023_764_MOESM4_ESM.pdf]

| <b>Supplementary Table 1. Characteristics of the study participants in the healthy safety population</b> |             |
|----------------------------------------------------------------------------------------------------------|-------------|
| <b>Intradermal</b>                                                                                       |             |
| Numbers of participants                                                                                  | 59          |
| Male sex                                                                                                 | 30 (50.8)   |
| Han Chinese                                                                                              | 59 (100.0)  |
| Age (y)                                                                                                  | 13.7 (1.5)  |
| <b>Intramuscular</b>                                                                                     |             |
| Number of participants                                                                                   | 119         |
| Male sex                                                                                                 | 65 (54.6)   |
| Han Chinese                                                                                              | 119 (100.0) |
| Age (y)                                                                                                  | 14.3 (17.6) |
| Values are either counts (%) or means (standard deviations)                                              |             |

**Supplementary Table 2.** Humoral immunogenicity outcomes against wild type SARS-CoV-2 at baseline in the evaluable and expanded analysis populations

| Variables                                                                                                                                                                                                                                                                                                                                                                                                                                                                                                                                                        | Intramuscular       | Intradermal         | P        |
|------------------------------------------------------------------------------------------------------------------------------------------------------------------------------------------------------------------------------------------------------------------------------------------------------------------------------------------------------------------------------------------------------------------------------------------------------------------------------------------------------------------------------------------------------------------|---------------------|---------------------|----------|
|                                                                                                                                                                                                                                                                                                                                                                                                                                                                                                                                                                  | Pre-dose 1          | Pre-dose 1          |          |
| <b>S-RBD IgG on ELISA (evaluable)</b>                                                                                                                                                                                                                                                                                                                                                                                                                                                                                                                            |                     |                     |          |
| N                                                                                                                                                                                                                                                                                                                                                                                                                                                                                                                                                                | 119                 | 54                  |          |
| GM OD450 value (95% CI)                                                                                                                                                                                                                                                                                                                                                                                                                                                                                                                                          | 0.250 (0.250-0.250) | 0.250 (0.250-0.250) | NA       |
| %positive ( $\geq$ LOD at 0.3)                                                                                                                                                                                                                                                                                                                                                                                                                                                                                                                                   | 0.0                 | 0.0                 | > 0.9999 |
| <b>S-RBD ACE2-blocking antibody on sVNT (evaluable)</b>                                                                                                                                                                                                                                                                                                                                                                                                                                                                                                          |                     |                     |          |
| N                                                                                                                                                                                                                                                                                                                                                                                                                                                                                                                                                                | 119                 | 54                  |          |
| GM% inhibition (95% CI)                                                                                                                                                                                                                                                                                                                                                                                                                                                                                                                                          | 15.0 (15.0-15.0)    | 15.0 (15.0-15.0)    | NA       |
| %positive ( $\geq$ LOQ at 30%)                                                                                                                                                                                                                                                                                                                                                                                                                                                                                                                                   | 0.0                 | 0.0                 | > 0.9999 |
| <b>S-RBD IgG on ELISA (expanded)</b>                                                                                                                                                                                                                                                                                                                                                                                                                                                                                                                             |                     |                     |          |
| N                                                                                                                                                                                                                                                                                                                                                                                                                                                                                                                                                                | 119                 | 59                  |          |
| GM OD450 value (95% CI)                                                                                                                                                                                                                                                                                                                                                                                                                                                                                                                                          | 0.250 (0.250-0.250) | 0.250 (0.250-0.250) | NA       |
| %positive ( $\geq$ LOD at 0.3)                                                                                                                                                                                                                                                                                                                                                                                                                                                                                                                                   | 0.0                 | 0.0                 | > 0.9999 |
| <b>S-RBD ACE2-blocking antibody on sVNT (expanded)</b>                                                                                                                                                                                                                                                                                                                                                                                                                                                                                                           |                     |                     |          |
| N                                                                                                                                                                                                                                                                                                                                                                                                                                                                                                                                                                | 119                 | 59                  |          |
| GM% inhibition (95% CI)                                                                                                                                                                                                                                                                                                                                                                                                                                                                                                                                          | 15.0 (15.0-15.0)    | 15.0 (15.0-15.0)    | NA       |
| %positive ( $\geq$ LOQ at 30%)                                                                                                                                                                                                                                                                                                                                                                                                                                                                                                                                   | 0.0                 | 0.0                 | > 0.9999 |
| <p>SARS-CoV-2 severe acute respiratory syndrome coronavirus 2, S spike protein, RBD receptor-binding domain, IgG immunoglobulin G, ELISA enzyme-linked immunosorbent assay, N nucleocapsid protein, GM geometric mean, OD optical density, LOD limit of detection, LOQ limit of quantification, CI confidence interval, ACE2 angiotensin-converting enzyme 2, sVNT surrogate virus neutralization test, NA not applicable. P values compare the proportion of positive responses between intramuscular and intradermal administration by Fisher's exact test</p> |                     |                     |          |

**Supplementary Table 3.** Humoral immunogenicity outcomes against wild type SARS-CoV-2 post-dose 2 and post-dose 3 of CoronaVac in the expanded analysis population

| Variables                                                                                                                                                                                                                                                                                                                                                                                                                                                                                                                                                                                                              | Intramuscular       |                     | Intradermal         |                     |
|------------------------------------------------------------------------------------------------------------------------------------------------------------------------------------------------------------------------------------------------------------------------------------------------------------------------------------------------------------------------------------------------------------------------------------------------------------------------------------------------------------------------------------------------------------------------------------------------------------------------|---------------------|---------------------|---------------------|---------------------|
|                                                                                                                                                                                                                                                                                                                                                                                                                                                                                                                                                                                                                        | 2 doses             | 3 doses             | 2 doses             | 3 doses             |
| <b>S IgG on ELISA</b>                                                                                                                                                                                                                                                                                                                                                                                                                                                                                                                                                                                                  |                     |                     |                     |                     |
| N                                                                                                                                                                                                                                                                                                                                                                                                                                                                                                                                                                                                                      | 116                 | 77                  | 47                  | 37                  |
| GM OD450 value (95% CI)                                                                                                                                                                                                                                                                                                                                                                                                                                                                                                                                                                                                | 0.536 (0.493-0.582) | 0.872 (0.785-0.968) | 0.634 (0.562-0.716) | 1.050 (0.983-1.120) |
| %positive ( $\geq$ LOD at 0.3)                                                                                                                                                                                                                                                                                                                                                                                                                                                                                                                                                                                         | 94.0                | 97.4                | 95.7, $P > 0.9999$  | 100, $P > 0.9999$   |
| <b>S-RBD IgG on ELISA</b>                                                                                                                                                                                                                                                                                                                                                                                                                                                                                                                                                                                              |                     |                     |                     |                     |
| N                                                                                                                                                                                                                                                                                                                                                                                                                                                                                                                                                                                                                      | 119                 | 82                  | 59                  | 43                  |
| GM OD450 value (95% CI)                                                                                                                                                                                                                                                                                                                                                                                                                                                                                                                                                                                                | 1.200 (1.100-1.310) | 1.69 (1.600-1.780)  | 2.15 (2.030-2.280)  | 2.43 (2.310-2.560)  |
| %positive ( $\geq$ LOD at 0.5)                                                                                                                                                                                                                                                                                                                                                                                                                                                                                                                                                                                         | 96.6                | 100.0               | 100.0, $P = 0.303$  | 100.0, $P > 0.9999$ |
| <b>S-RBD ACE2-blocking antibody on sVNT</b>                                                                                                                                                                                                                                                                                                                                                                                                                                                                                                                                                                            |                     |                     |                     |                     |
| N                                                                                                                                                                                                                                                                                                                                                                                                                                                                                                                                                                                                                      | 119                 | 82                  | 59                  | 43                  |
| GM% inhibition (95% CI)                                                                                                                                                                                                                                                                                                                                                                                                                                                                                                                                                                                                | 71.2 (66.7-76.0)    | 84.0 (81.0-87.1)    | 78.2 (74.5-82.1)    | 90.7 (87.5-94.0)    |
| %positive ( $\geq$ LOQ at 30%)                                                                                                                                                                                                                                                                                                                                                                                                                                                                                                                                                                                         | 96.6                | 100.0               | 100.0, $P = 0.303$  | 100.0, $P > 0.9999$ |
| <b>Neutralizing antibody on PRNT</b>                                                                                                                                                                                                                                                                                                                                                                                                                                                                                                                                                                                   |                     |                     |                     |                     |
| N                                                                                                                                                                                                                                                                                                                                                                                                                                                                                                                                                                                                                      | 119                 | 82                  | 59                  | 43                  |
| GM PRNT90 (95% CI)                                                                                                                                                                                                                                                                                                                                                                                                                                                                                                                                                                                                     | 9.8 (8.7-11.1)      | 18.2 (14.5-22.9)    | 10.9 (8.39-14.1)    | 37.5 (26.8-52.4)    |
| %positive ( $\geq$ LOD at 10)                                                                                                                                                                                                                                                                                                                                                                                                                                                                                                                                                                                          | 65.6                | 80.5                | 62.7, $P = 0.741$   | 97.7, $P = 0.0061$  |
| GM PRNT50 (95% CI)                                                                                                                                                                                                                                                                                                                                                                                                                                                                                                                                                                                                     | 26.8 (23.0-31.1)    | 54.2 (44.3-66.5)    | 30.5 (24.1-38.6)    | 105.0 (78.9-140.0)  |
| %positive ( $\geq$ LOD at 10)                                                                                                                                                                                                                                                                                                                                                                                                                                                                                                                                                                                          | 96.6                | 100.0               | 98.3, $P > 0.9999$  | 100, $P > 0.9999$   |
| <b>S IgG avidity on ELISA</b>                                                                                                                                                                                                                                                                                                                                                                                                                                                                                                                                                                                          |                     |                     |                     |                     |
| N                                                                                                                                                                                                                                                                                                                                                                                                                                                                                                                                                                                                                      | 109                 | 75                  | 45                  | 37                  |
| GM avidity index (95% CI)                                                                                                                                                                                                                                                                                                                                                                                                                                                                                                                                                                                              | 20.5 (19.1-22.1)    | 35.6 (32.5-39.1)    | 7.0 (5.0-9.6)       | 52.6 (47.7-58.1)    |
| <b>S IgG Fc<math>\gamma</math>RIIIa-binding on ELISA</b>                                                                                                                                                                                                                                                                                                                                                                                                                                                                                                                                                               |                     |                     |                     |                     |
| N                                                                                                                                                                                                                                                                                                                                                                                                                                                                                                                                                                                                                      | 116                 | 77                  | 47                  | 37                  |
| GM OD450 value (95% CI)                                                                                                                                                                                                                                                                                                                                                                                                                                                                                                                                                                                                | 0.749 (0.649-0.864) | 1.300 (1.140-1.490) | 1.100 (0.955-1.270) | 1.780 (1.700-1.870) |
| %positive ( $\geq$ LOD at 0.28)                                                                                                                                                                                                                                                                                                                                                                                                                                                                                                                                                                                        | 87.1                | 97.4                | 95.7, $P = 0.156$   | 100.0, $P > 0.9999$ |
| SARS-CoV-2 severe acute respiratory syndrome coronavirus 2, S spike protein, N nucleocapsid protein, IgG immunoglobulin G, ELISA enzyme-linked immunosorbent assay, IgG immunoglobulin G, GM geometric mean, OD optical density, LOD limit of detection, LOQ limit of quantification, CI confidence interval, ACE2 angiotensin-converting enzyme 2, sVNT surrogate virus neutralization test, PRNT plaque reduction neutralization titer, Fc $\gamma$ RIIIa Fc gamma receptor III-a. P values compare the proportion of positive responses between intramuscular and intradermal administration by Fisher's exact test |                     |                     |                     |                     |

**Supplementary Table 4.** Cellular immunogenicity outcomes against wild type SARS-CoV-2 S, N and M peptide pools at baseline in the evaluable and expanded analysis populations

| Variables                                                                                                                                                                                                                                                                                                                                         | Intramuscular       | Intradermal         | P        |
|---------------------------------------------------------------------------------------------------------------------------------------------------------------------------------------------------------------------------------------------------------------------------------------------------------------------------------------------------|---------------------|---------------------|----------|
|                                                                                                                                                                                                                                                                                                                                                   | Pre-dose 1          | Pre-dose 1          |          |
| <b>Total SNM-specific T-cell responses on flow cytometry</b>                                                                                                                                                                                                                                                                                      |                     |                     |          |
| N                                                                                                                                                                                                                                                                                                                                                 | 59                  | 47                  |          |
| GM% IFN- $\gamma$ <sup>+</sup> CD4 <sup>+</sup> T cells (95% CI)                                                                                                                                                                                                                                                                                  | 0.016 (0.012-0.021) | 0.022 (0.014-0.032) | 0.177    |
| %positive ( $\geq$ cut-off at 0.0075%)                                                                                                                                                                                                                                                                                                            | 83.3                | 81.3                | 0.804    |
| GM% IL-2 <sup>+</sup> CD4 <sup>+</sup> T cells (95% CI)                                                                                                                                                                                                                                                                                           | 0.015 (0.012-0.018) | 0.019 (0.013-0.027) | 0.211    |
| %positive ( $\geq$ cut-off at 0.0075%)                                                                                                                                                                                                                                                                                                            | 83.3                | 79.2                | 0.624    |
| GM% IFN- $\gamma$ <sup>+</sup> CD8 <sup>+</sup> T cells (95% CI)                                                                                                                                                                                                                                                                                  | 0.016 (0.012-0.022) | 0.022 (0.015-0.033) | 0.225    |
| %positive ( $\geq$ cut-off at 0.0075%)                                                                                                                                                                                                                                                                                                            | 65.0                | 62.5                | 0.842    |
| GM% IL-2 <sup>+</sup> CD8 <sup>+</sup> T cells (95% CI)                                                                                                                                                                                                                                                                                           | 0.014 (0.012-0.017) | 0.023 (0.015-0.034) | 0.014    |
| %positive ( $\geq$ cut-off at 0.0075%)                                                                                                                                                                                                                                                                                                            | 58.3                | 68.8                | 0.318    |
| <b>S-specific T-cell responses on flow cytometry</b>                                                                                                                                                                                                                                                                                              |                     |                     |          |
| N                                                                                                                                                                                                                                                                                                                                                 | 60                  | 48                  |          |
| GM% IFN- $\gamma$ <sup>+</sup> CD4 <sup>+</sup> T cells (95% CI)                                                                                                                                                                                                                                                                                  | 0.006 (0.004-0.008) | 0.005 (0.003-0.007) | 0.559    |
| %positive ( $\geq$ cut-off at 0.0075%)                                                                                                                                                                                                                                                                                                            | 35.0                | 25.0                | 2.298    |
| GM% IL-2 <sup>+</sup> CD4 <sup>+</sup> T cells (95% CI)                                                                                                                                                                                                                                                                                           | 0.005 (0.004-0.007) | 0.004 (0.003-0.006) | 0.131    |
| %positive ( $\geq$ cut-off at 0.0075%)                                                                                                                                                                                                                                                                                                            | 48.3                | 16.7                | 0.001    |
| GM% IFN- $\gamma$ <sup>+</sup> CD8 <sup>+</sup> T cells (95% CI)                                                                                                                                                                                                                                                                                  | 0.004 (0.003-0.005) | 0.005 (0.003-0.007) | 0.449    |
| %positive ( $\geq$ cut-off at 0.0075%)                                                                                                                                                                                                                                                                                                            | 16.7                | 22.9                | 0.469    |
| GM% IL-2 <sup>+</sup> CD8 <sup>+</sup> T cells (95% CI)                                                                                                                                                                                                                                                                                           | 0.004 (0.003-0.005) | 0.004 (0.003-0.006) | 0.916    |
| %positive ( $\geq$ cut-off at 0.0075%)                                                                                                                                                                                                                                                                                                            | 26.7                | 20.8                | 0.507    |
| <b>N-specific T-cell responses on flow cytometry</b>                                                                                                                                                                                                                                                                                              |                     |                     |          |
| N                                                                                                                                                                                                                                                                                                                                                 | 59                  | 47                  |          |
| GM% IFN- $\gamma$ <sup>+</sup> CD4 <sup>+</sup> T cells (95% CI)                                                                                                                                                                                                                                                                                  | 0.003 (0.002-0.004) | 0.005 (0.004-0.008) | 0.006    |
| %positive ( $\geq$ cut-off at 0.0075%)                                                                                                                                                                                                                                                                                                            | 10.2                | 27.7                | 0.024    |
| GM% IL-2 <sup>+</sup> CD4 <sup>+</sup> T cells (95% CI)                                                                                                                                                                                                                                                                                           | 0.003 (0.003-0.004) | 0.005 (0.003-0.007) | 0.053    |
| %positive ( $\geq$ cut-off at 0.0075%)                                                                                                                                                                                                                                                                                                            | 18.6                | 23.4                | 0.632    |
| GM% IFN- $\gamma$ <sup>+</sup> CD8 <sup>+</sup> T cells (95% CI)                                                                                                                                                                                                                                                                                  | 0.004 (0.003-0.005) | 0.006 (0.004-0.010) | 0.096    |
| %positive ( $\geq$ cut-off at 0.0075%)                                                                                                                                                                                                                                                                                                            | 17.0                | 27.7                | 0.237    |
| GM% IL-2 <sup>+</sup> CD8 <sup>+</sup> T cells (95% CI)                                                                                                                                                                                                                                                                                           | 0.003 (0.003-0.004) | 0.007 (0.003-0.005) | 0.001    |
| %positive ( $\geq$ cut-off at 0.0075%)                                                                                                                                                                                                                                                                                                            | 17.0                | 36.2                | 0.027    |
| <b>M-specific T-cell responses on flow cytometry</b>                                                                                                                                                                                                                                                                                              |                     |                     |          |
| N                                                                                                                                                                                                                                                                                                                                                 | 59                  | 47                  |          |
| GM% IFN- $\gamma$ <sup>+</sup> CD4 <sup>+</sup> T cells (95% CI)                                                                                                                                                                                                                                                                                  | 0.004 (0.003-0.006) | 0.005 (0.003-0.006) | 0.679    |
| %positive ( $\geq$ cut-off at 0.0075%)                                                                                                                                                                                                                                                                                                            | 23.3                | 23.4                | > 0.9999 |
| GM% IL-2 <sup>+</sup> CD4 <sup>+</sup> T cells (95% CI)                                                                                                                                                                                                                                                                                           | 0.004 (0.003-0.005) | 0.004 (0.003-0.005) | 0.947    |
| %positive ( $\geq$ cut-off at 0.0075%)                                                                                                                                                                                                                                                                                                            | 32.3                | 19.2                | 0.183    |
| GM% IFN- $\gamma$ <sup>+</sup> CD8 <sup>+</sup> T cells (95% CI)                                                                                                                                                                                                                                                                                  | 0.004 (0.003-0.005) | 0.004 (0.003-0.006) | 0.703    |
| %positive ( $\geq$ cut-off at 0.0075%)                                                                                                                                                                                                                                                                                                            | 17.9                | 14.9                | > 0.9999 |
| GM% IL-2 <sup>+</sup> CD8 <sup>+</sup> T cells (95% CI)                                                                                                                                                                                                                                                                                           | 0.004 (0.003-0.005) | 0.004 (0.003-0.006) | 0.819    |
| %positive ( $\geq$ cut-off at 0.0075%)                                                                                                                                                                                                                                                                                                            | 33.9                | 19.2                | 0.125    |
| SARS-CoV-2 severe acute respiratory syndrome coronavirus 2, S spike, N nucleocapsid protein, M membrane protein, GM geometric mean, IFN- $\gamma$ interferon-gamma, IL-2 interleukin-2, CI confidence interval. P values compare the proportion of positive responses between intramuscular and intradermal administration by Fisher's exact test |                     |                     |          |

**Supplementary Table 5.** Cellular immunogenicity outcomes against wild type SARS-CoV-2 S, N and M peptide pools post-dose 2 and post-dose 3 of CoronaVac in the expanded analysis population

| Variables                                                                                                                                                                                                                                                                                                                                                | Intramuscular       |                     | Intradermal             |                         |
|----------------------------------------------------------------------------------------------------------------------------------------------------------------------------------------------------------------------------------------------------------------------------------------------------------------------------------------------------------|---------------------|---------------------|-------------------------|-------------------------|
|                                                                                                                                                                                                                                                                                                                                                          | 2 doses             | 3 doses             | 2 doses                 | 3 doses                 |
| <b>Total S, N, M-specific T-cell responses on flow cytometry</b>                                                                                                                                                                                                                                                                                         |                     |                     |                         |                         |
| N                                                                                                                                                                                                                                                                                                                                                        | 60                  | 69                  | 48                      | 41                      |
| GM% IFN- $\gamma$ <sup>+</sup> CD4 <sup>+</sup> T cells (95% CI)                                                                                                                                                                                                                                                                                         | 0.058 (0.040-0.083) | 0.068 (0.044-0.104) | 0.107 (0.063-0.183)     | 0.107 (0.056-0.204)     |
| %positive ( $\geq$ cut-off at 0.0075%)                                                                                                                                                                                                                                                                                                                   | 83.3                | 73.9                | 81.3, <i>P</i> = 0.804  | 78.1, <i>P</i> = 0.656  |
| GM% IL-2 <sup>+</sup> CD4 <sup>+</sup> T cells (95% CI)                                                                                                                                                                                                                                                                                                  | 0.040 (0.030-0.052) | 0.079 (0.055-0.112) | 0.112 (0.068-0.183)     | 0.142 (0.078-0.258)     |
| %positive ( $\geq$ cut-off at 0.0075%)                                                                                                                                                                                                                                                                                                                   | 83.3                | 81.2                | 79.2, <i>P</i> = 0.624  | 80.5, <i>P</i> > 0.9999 |
| GM% IFN- $\gamma$ <sup>+</sup> CD8 <sup>+</sup> T cells (95% CI)                                                                                                                                                                                                                                                                                         | 0.050 (0.033-0.077) | 0.064 (0.038-0.107) | 0.059 (0.033-0.104)     | 0.064 (0.033-0.124)     |
| %positive ( $\geq$ cut-off at 0.0075%)                                                                                                                                                                                                                                                                                                                   | 65.0                | 59.4                | 62.5, <i>P</i> = 0.842  | 63.4, <i>P</i> = 0.692  |
| GM% IL-2 <sup>+</sup> CD8 <sup>+</sup> T cells (95% CI)                                                                                                                                                                                                                                                                                                  | 0.017 (0.014-0.022) | 0.039 (0.026-0.057) | 0.050 (0.031-0.803)     | 0.067 (0.035-0.127)     |
| %positive ( $\geq$ cut-off at 0.0075%)                                                                                                                                                                                                                                                                                                                   | 58.3                | 60.9                | 68.8, <i>P</i> = 0.318  | 65.9, <i>P</i> = 0.685  |
| <b>S-specific T-cell responses on flow cytometry</b>                                                                                                                                                                                                                                                                                                     |                     |                     |                         |                         |
| N                                                                                                                                                                                                                                                                                                                                                        | 60                  | 70                  | 48                      | 42                      |
| GM% IFN- $\gamma$ <sup>+</sup> CD4 <sup>+</sup> T cells (95% CI)                                                                                                                                                                                                                                                                                         | 0.023 (0.015-0.036) | 0.015 (0.010-0.024) | 0.022 (0.012-0.040)     | 0.027 (0.014-0.051)     |
| %positive ( $\geq$ cut-off at 0.005%)                                                                                                                                                                                                                                                                                                                    | 70.0                | 54.3                | 58.3, <i>P</i> = 0.229  | 69.1, <i>P</i> = 0.164  |
| GM% IL-2 <sup>+</sup> CD4 <sup>+</sup> T cells (95% CI)                                                                                                                                                                                                                                                                                                  | 0.015 (0.011-0.020) | 0.018 (0.011-0.027) | 0.020 (0.012-0.035)     | 0.032 (0.017-0.059)     |
| %positive ( $\geq$ cut-off at 0.005%)                                                                                                                                                                                                                                                                                                                    | 73.3                | 60.0                | 60.4, <i>P</i> = 0.214  | 69.1, <i>P</i> = 0.419  |
| GM% IFN- $\gamma$ <sup>+</sup> CD8 <sup>+</sup> T cells (95% CI)                                                                                                                                                                                                                                                                                         | 0.014 (0.009-0.024) | 0.017 (0.010-0.029) | 0.014 (0.008-0.025)     | 0.010 (0.006-0.0197)    |
| %positive ( $\geq$ cut-off at 0.005%)                                                                                                                                                                                                                                                                                                                    | 48.3                | 48.6                | 45.8, <i>P</i> = 0.848  | 40.5, <i>P</i> = 0.439  |
| GM% IL-2 <sup>+</sup> CD8 <sup>+</sup> T cells (95% CI)                                                                                                                                                                                                                                                                                                  | 0.006 (0.005-0.008) | 0.010 (0.006-0.015) | 0.012 (0.007-0.020)     | 0.010 (0.006-0.018)     |
| %positive ( $\geq$ cut-off at 0.005%)                                                                                                                                                                                                                                                                                                                    | 48.3                | 45.7                | 52.1, <i>P</i> = 0.847  | 41.5, <i>P</i> = 0.696  |
| <b>N-specific T-cell responses on flow cytometry</b>                                                                                                                                                                                                                                                                                                     |                     |                     |                         |                         |
| N                                                                                                                                                                                                                                                                                                                                                        | 60                  | 69                  | 48                      | 41                      |
| GM% IFN- $\gamma$ <sup>+</sup> CD4 <sup>+</sup> T cells (95% CI)                                                                                                                                                                                                                                                                                         | 0.011 (0.008-0.017) | 0.013 (0.008-0.022) | 0.022 (0.011-0.043)     | 0.022 (0.011-0.044)     |
| %positive ( $\geq$ cut-off at 0.005%)                                                                                                                                                                                                                                                                                                                    | 55.0                | 50.7                | 54.2, <i>P</i> > 0.9999 | 58.5, <i>P</i> = 0.438  |
| GM% IL-2 <sup>+</sup> CD4 <sup>+</sup> T cells (95% CI)                                                                                                                                                                                                                                                                                                  | 0.001 (0.009-0.018) | 0.019 (0.012-0.029) | 0.028 (0.015-0.053)     | 0.028 (0.014-0.055)     |
| %positive ( $\geq$ cut-off at 0.005%)                                                                                                                                                                                                                                                                                                                    | 66.7                | 60.9                | 60.4, <i>P</i> = 0.549  | 63.4, <i>P</i> = 0.841  |
| GM% IFN- $\gamma$ <sup>+</sup> CD8 <sup>+</sup> T cells (95% CI)                                                                                                                                                                                                                                                                                         | 0.008 (0.005-0.012) | 0.013 (0.008-0.023) | 0.016 (0.008-0.031)     | 0.012 (0.006-0.025)     |
| %positive ( $\geq$ cut-off at 0.005%)                                                                                                                                                                                                                                                                                                                    | 31.7                | 39.1                | 43.8, <i>P</i> = 0.232  | 39.0, <i>P</i> > 0.9999 |
| GM% IL-2 <sup>+</sup> CD8 <sup>+</sup> T cells (95% CI)                                                                                                                                                                                                                                                                                                  | 0.004 (0.003-0.005) | 0.009 (0.006-0.014) | 0.014 (0.008-0.024)     | 0.014 (0.007-0.026)     |
| %positive ( $\geq$ cut-off at 0.005%)                                                                                                                                                                                                                                                                                                                    | 28.3                | 37.7                | 47.9, <i>P</i> = 0.046  | 48.8, <i>P</i> = 0.318  |
| <b>M-specific T-cell responses on flow cytometry</b>                                                                                                                                                                                                                                                                                                     |                     |                     |                         |                         |
| N                                                                                                                                                                                                                                                                                                                                                        | 60                  | 70                  | 48                      | 41                      |
| GM% IFN- $\gamma$ <sup>+</sup> CD4 <sup>+</sup> T cells (95% CI)                                                                                                                                                                                                                                                                                         | 0.007 (0.005-0.010) | 0.006 (0.004-0.010) | 0.008 (0.005-0.014)     | 0.011 (0.005-0.022)     |
| %positive ( $\geq$ cut-off at 0.005%)                                                                                                                                                                                                                                                                                                                    | 36.7                | 25.7                | 35.4, <i>P</i> > 0.9999 | 34.2, <i>P</i> = 0.389  |
| GM% IL-2 <sup>+</sup> CD4 <sup>+</sup> T cells (95% CI)                                                                                                                                                                                                                                                                                                  | 0.006 (0.004-0.007) | 0.006 (0.004-0.009) | 0.011 (0.006-0.019)     | 0.014 (0.007-0.029)     |
| %positive ( $\geq$ cut-off at 0.005%)                                                                                                                                                                                                                                                                                                                    | 46.7                | 27.1                | 41.7, <i>P</i> = 0.698  | 46.3, <i>P</i> = 0.061  |
| GM% IFN- $\gamma$ <sup>+</sup> CD8 <sup>+</sup> T cells (95% CI)                                                                                                                                                                                                                                                                                         | 0.006 (0.004-0.009) | 0.004 (0.003-0.007) | 0.007 (0.004-0.011)     | 0.012 (0.006-0.023)     |
| %positive ( $\geq$ cut-off at 0.005%)                                                                                                                                                                                                                                                                                                                    | 25.0                | 11.4                | 29.2, <i>P</i> = 0.667  | 41.5, <i>P</i> = 0.0004 |
| GM% IL-2 <sup>+</sup> CD8 <sup>+</sup> T cells (95% CI)                                                                                                                                                                                                                                                                                                  | 0.004 (0.003-0.005) | 0.004 (0.003-0.006) | 0.005 (0.004-0.008)     | 0.012 (0.006-0.023)     |
| %positive ( $\geq$ cut-off at 0.005%)                                                                                                                                                                                                                                                                                                                    | 23.3                | 15.7                | 27.1, <i>P</i> = 0.662  | 46.3, <i>P</i> = 0.0008 |
| SARS-CoV-2 severe acute respiratory syndrome coronavirus 2, S spike, N nucleocapsid protein, M membrane protein, GM geometric mean, IFN- $\gamma$ interferon-gamma, IL-2 interleukin-2, CI confidence interval. <i>P</i> values compare the proportion of positive responses between intramuscular and intradermal administration by Fisher's exact test |                     |                     |                         |                         |

**Supplementary Table 6.** Unsolicited adverse events within 28 days of vaccination in the healthy safety population

| <b>Variables</b>                                                                                                    | <b>Intramuscular (N = 123)</b> | <b>Intradermal (N = 59)</b> | <b>Overall (N = 182)</b> |
|---------------------------------------------------------------------------------------------------------------------|--------------------------------|-----------------------------|--------------------------|
| <b>Summary of adverse events and severe adverse events</b>                                                          |                                |                             |                          |
| Any adverse event                                                                                                   | 8 (0.065)                      | 5 (0.085)                   | 13 (0.071)               |
| Grade 1                                                                                                             | 8 (0.065)                      | 4 (0.068)                   | 12 (0.066)               |
| Grade 2                                                                                                             | 0 (0.000)                      | 0 (0.000)                   | 0 (0.000)                |
| Grade 3                                                                                                             | 0 (0.000)                      | 1 (0.017)                   | 1 (0.005)                |
| Severe                                                                                                              | 0 (0.000)                      | 0 (0.000)                   | 0 (0.000)                |
| Data are number of events (events per participant). N total number of participants in the healthy safety population |                                |                             |                          |
